# Supplementary material
Source: PubMed Central journal article supplement (PMC4666828)
Supplement: NIHMS696709-supplement.pdf [file NIHMS696709-supplement.pdf]

# **Sleep Disturbance, Sleep Duration, and Inflammation: A Systematic Review and Meta-Analysis of Cohort Studies and Experimental Sleep Deprivation**

## ***Supplemental Information***

### **Table of Contents**

|                                                                               |       |
|-------------------------------------------------------------------------------|-------|
| Figure S1. Summary of Literature Search                                       | 2     |
| Table S1. Studies evaluating sleep disturbance and inflammation               | 3-4   |
| Table S2. Studies evaluating sleep duration and inflammation                  | 5     |
| Table S3. Studies evaluating experimental sleep loss and inflammation         | 6     |
| Figure S2. Sleep disturbance and tumor necrosis factor- $\alpha$              | 7     |
| Figure S3. Sleep duration and tumor necrosis factor- $\alpha$                 | 8     |
| Figure S4. Sleep duration categories and tumor necrosis factor- $\alpha$      | 9     |
| Figure S5. Experimental sleep deprivation and tumor necrosis factor- $\alpha$ | 10    |
| Supplemental References                                                       | 11-12 |

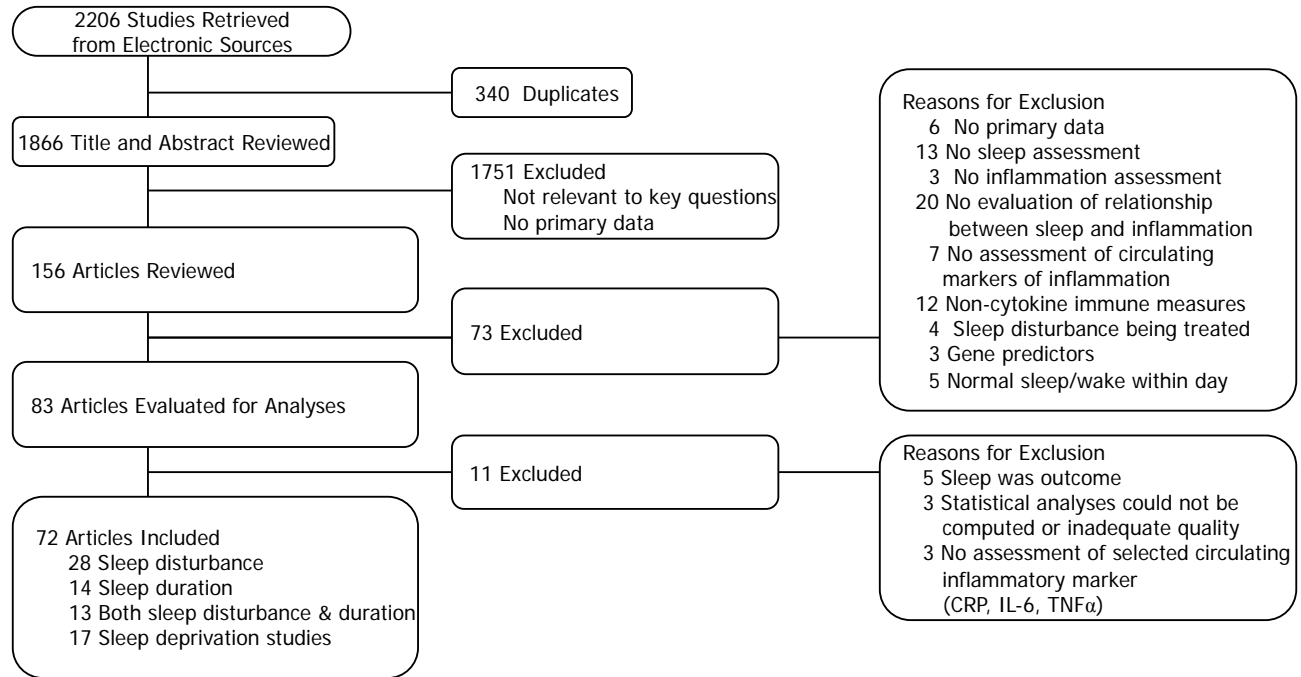

**Figure S1.** Summary of Literature Search

**Table S1.** Description of studies evaluating sleep disturbance and inflammation as indexed by C-reactive protein (CRP) and circulating levels of interleukin-6 (IL-6). Sleep disturbance was associated with CRP and IL-6 as a significant increase (+), significant decrease (-) or no difference (0). Sleep disturbance was assessed by single item (Item); symptom reporting (SX); questionnaire (Qu); polysomnography (PSG); or clinical diagnosis (DX).

| Study                        | Design        | Sample                            | N    | Age          | M/F       | Sleep Assessment | Inflammation Assessment         | Findings          |
|------------------------------|---------------|-----------------------------------|------|--------------|-----------|------------------|---------------------------------|-------------------|
| Afshar et al., 2011 (49)     | Experimental  | End stage renal disease           | 28   | 51.9(20.2)   | 28/0      | Qu               | CRP                             | CRP+              |
| Almeida et al., 2011 (26)    | Epidemiologic | Community sample                  | 3906 | 70-90        | 3906/0    | SX               | CRP                             | CRP 0             |
| Bornivelli et al., 2008 (50) | Naturalistic  | End stage renal disease           | 45   | 59 (16.2)    | 32/13     | Qu               | CRP                             | CRP+              |
| Bower et al., 2009 (33)      | Naturalistic  | Breast / prostate cancer          | 48   | 62.7 (29-75) | 20/28     | Qu               | CRP/IL-6*                       | CRP=0/IL-6=0      |
| Bower et al., 2011 (51)      | Naturalistic  | Breast cancer                     | 103  | 51.2(32-66)  | 0/103     | Qu               | CRP*                            | CRP 0             |
| Burgos et al., 2006 (34)     | Naturalistic  | Insomniacs/Healthy controls       | 22   | 26-58        | 4/18      | Qu/PSG           | IL-6                            | IL6=+             |
| Chiu et al., 2009 (35)       | Naturalistic  | End stage renal disease           | 114  | 56.8 (11.8)  | 60/54     | Qu               | CRP/IL-6/TNF* CRP+/IL-6=0/TNF=+ | CRP+/IL-6=0/TNF=+ |
| Christian, 2011 (36)         | Naturalistic  | Caregivers/non-caregivers         | 250  | 63.8 (13.7)  | 65/185    | Qu               | CRP/IL-6                        | CRP+/IL-6=0       |
| Clevenger et al., 2012 ( )   | Naturalistic  | Ovarian cancer                    | 136  | 60.4(12.39)  | 0/136     | Qu               | IL-6                            | IL-6+             |
| Dowd et al., 2011 (38)       | Epidemiologic | >53 yo                            | 1020 | 66.1 (10.4)  | 540/480   | Qu               | CRP/IL-6                        | CRP 0/IL-6=0      |
| Erten et al., 2005 (20)      | Naturalistic  | End stage renal disease / Healthy | 18   | 39.4         | 14/4      | SX               | IL-6/TNF*                       | IL-6=0/TNF=+      |
| Friedman et al., 2005 (39)   | Naturalistic  | Community sample                  | 78   | 73.4 (6.9)   | 0/78      | Qu/PSG           | IL-6                            | IL-6+             |
| Graff et al., 2011 (52)      | Naturalistic  | Inflammatory bowel disease        | 318  | 43 (14.1)    | 127/191   | Qu               | CRP                             | CRP=0             |
| Heffner et al., 2011 (40)    | Naturalistic  | Chronic lower back pain/ Healthy  | 50   | 30.8(11.4)   | 20/30     | Qu               | IL-6                            | IL-6=0            |
| Heffner et al., 2012 (41)    | Naturalistic  | Community sample                  | 83   | 61.2 (8.8)   | 38/45     | Qu               | IL-6                            | IL-6=0            |
| Hong et al., 2005 (21)       | Naturalistic  | Community sample                  | 70   | 35.7(7.6)    | 36/34     | PSG              | IL-6                            | IL-6=0            |
| Jackowska et al.,2013(27)    | Epidemiologic | Community sample                  | 2916 | 65.9         | 2916      | SX               | CRP                             | Mixed             |
| Laugsand et al., 2012 (28)   | Epidemiologic | Community sample                  | 8547 | 43.4 - 53.7  | 3266/3744 | SX               | CRP                             | CRP+              |
| Lavie et al., 2007 (29)      | Case Control  | Shift workers                     | 129  | 56.3 (8.5)   | 129/0     | SX               | CRP                             | CRP-              |
| Lee, et al., 2009 (22)       | Naturalistic  | End stage renal disease           | 30   | 56.1 (10.7)  | 21/9      | PSG              | CRP/IL-6                        | CRP=0/IL-6=0      |
| Li et al., 2012 (53)         | Naturalistic  | End stage renal disease           | 212  | 49.9 (16.7)  | 114/98    | Qu               | CRP                             | CRP+              |

\*Studies that have evaluated sleep disturbance and inflammation as indexed by other cytokines including interleukin-1 $\beta$  (IL-1) ( $n = 4$ ) (1-4); IL-1 receptor antagonist (IL-1ra) ( $n = 3$ ) (1, 2, 5); soluble IL-6 receptor (sIL6R) ( $n = 2$ ) (5, 6); IL-8 ( $n = 5$ ), tumor necrosis factor receptor I (TNFR1) ( $n = 1$ ) (7); and TNFR2 ( $n = 1$ ) (1).

See references in main text for studies described in the table.

**Table S1 continued.**

| Study                       | Design        | Sample                    | N     | Age         | M/F       | Sleep Assessment | Inflammation Assessment | Findings           |
|-----------------------------|---------------|---------------------------|-------|-------------|-----------|------------------|-------------------------|--------------------|
| Liukkonen et al., 2007(30)  | Epidemiologic | Community cohort          | 4011  | 31          | 2104/1907 | SX               | CRP                     | CRP+               |
| Mathews et al., 2010(54)    | Epidemiologic | Community sample          | 340   | 52 (IQR 3)  | 0/340     | Qu/PSG           | CRP                     | CRP+               |
| McDade et al., 2006(31)     | Naturalistic  | Community sample          | 188   | 59.5(4.3)   | 45/55     | Qu               | CRP                     | CRP=0              |
| Mills et al., 2007 (23)     | Naturalistic  | Community sample          | 124   | 38.6 (6.8)  | 59/65     | Qu               | IL-6                    | IL-6+              |
| Okun et al., 2007a (63)     | Naturalistic  | Pregnant                  | 35    | 31.0 (3.7)  | 0/35      | Qu               | CRP/IL-6/TNF*           | CRP 0/IL-6=0/TNF+  |
| Okun et al., 2009 (42)      | Naturalistic  | Healthy controls          | 43    | 28.2(5.2)   | 0/43      | Qu               | CRP/IL-6/TNF*           | CRP +/IL-6=0/TNF=0 |
| Okun et al., 2011 (58)      | Naturalistic  | 4 groups                  | 128   | 74.3 (6.6)  | 54/74     | DX               | IL-6                    | IL-6=0             |
| Prather et al., 2009 (44)   | Prospective   | Hepatitis C               | 95    | 47.3 (11.8) | 64/31     | Qu               | IL-6                    | IL-6=0             |
| Razeghi et al., 2012(55)    | Epidemiologic | End stage renal disease   | 108   | 56 (15)     | 62/46     | Qu/DX            | CRP                     | CRP+               |
| Song et al., 1998 (59)      | Experimental  | 3 groups                  | 24    | 42.3        | 15/9      | DX               | IL-6*                   | IL-6+              |
| Sabbagh et al., 2008 (56)   | Epidemiologic | End stage renal disease   | 46    | 61.9(16.9)  | 30/16     | Qu               | CRP                     | CRP=0              |
| Sprod et al., 2010 (4)      | Experimental  | Breast/Prostate cancer    | 38    | 60(12.1)    | 11/27     | Qu               | IL-6/TNF*               | IL-6=0/TNF=0       |
| Suarez, 2008 (45)           | Epidemiologic | Community sample          | 210   | 28.9 (9.7)  | 115/95    | Qu               | CRP/IL-6                | CRP=0/IL-6=0       |
| Valentine et al., 2009 (57) | Epidemiologic | Community sample 60+      | 127   | 70.5 (5)    | 47/80     | Qu               | CRP                     | CRP=0              |
| Valentine et al., 2011 (46) | Epidemiologic | Community sample 60+      | 182   | 69.2(6.7)   | 98/84     | Qu               | CRP/IL-6*               | CRP+/IL-6=0        |
| van Mark et al., 2010 (47)  | Experimental  | Shift/daytime workers     | 274   | 37.8 (8.7)  | NA        | Qu               | IL-6/TNF                | IL-6=0/TNF=0       |
| Vgontzas et al., 2002 (60)  | Experimental  | Insomnia/controls         | 22    | 29.4(6.6)   | 14/8      | DX/PSG           | IL-6/TNF                | IL-6=0/TNF-        |
| von Kanel et al., 2006(25)  | Experimental  | Caregivers/non-caregivers | 100   | 70.7 (7.9)  | 30/70     | PSG              | IL-6                    | IL-6+              |
| von Kanel et al., 2010 (48) | Experimental  | Caregivers/non-caregivers | 145   | 70.9(8.1)   | 104/41    | Qu/PSG           | CRP/IL-6                | CRP=0/IL-6=0       |
| Zhang et al., 2013 (32)     | Epidemiologic | National sample           | 10908 | 20-85+      | 5295/5613 | SX               | CRP                     | CRP+               |

\*Studies that have evaluated sleep disturbance and inflammation as indexed by other cytokines including interleukin-1 $\beta$  (IL-1) ( $n = 4$ ) (1-4); IL-1 receptor antagonist (IL-1ra) ( $n = 3$ ) (1, 2, 5); soluble IL-6 receptor (sIL6R) ( $n = 2$ ) (5, 6); IL-8 ( $n = 5$ ), tumor necrosis factor receptor I (TNFRI) ( $n = 1$ ) (7); and TNFRII ( $n = 1$ ) (1).

See references in main text for studies described in the table.

**Table S2.** Description of studies evaluating sleep duration and inflammation as indexed by C-reactive protein (CRP) and circulating levels of interleukin-6 (IL-6). Sleep duration was associated with CRP and IL-6 as a significant increase (+), significant decrease (-) or no difference (0). Sleep duration was assessed by single item (Item); symptom reporting (SX); questionnaire (Qu); polysomnography (PSG); or clinical diagnosis (DX).

| Study                        | Design        | Sample                       | N    | Age         | M/F       | Sleep Assessment | Inflammation Assessment | Findings           |
|------------------------------|---------------|------------------------------|------|-------------|-----------|------------------|-------------------------|--------------------|
| Burgos et al., 2006 (34)     | Naturalistic  | Insomniacs/Healthy controls  | 22   | 26-58       | 4/18      | Qu/PSG           | IL-6                    | IL6 mixed          |
| Dowd et al., 2011 (38)       | Epidemiologic | >53 yo                       | 1020 | 66.1 (10.4) | 540/480   | Item/Qu          | CRP/IL-6                | Mixed              |
| Ferrie et al., 2013 (71)     | Epidemiologic | Civil service                | 5003 | 49.3        | 3592/1411 | Item             | CRP/IL-6                | CRP+/IL6+          |
| Friedman et al., 2005 (39)   | Naturalistic  | Community sample             | 78   | 73.4 (6.9)  | 0/78      | Qu/PSG           | IL-6                    | IL-6=0             |
| Hong et al., 2005 (21)       | Naturalistic  | Community sample             | 70   | 35.7(7.6)   | 36/34     | PSG              | IL-6                    | IL-6 mixed         |
| Jackowska et al., 2013(27)   | Epidemiologic | Community sample             | 2916 | 65.9        | 2916      | Item             | CRP                     | CRP mixed          |
| Larkin et al., 2005 (70)     | Naturalistic  | Adolescents(13-18) w/wo SDB  | 143  | 13.8(0.8)   | 72/71     | Item/PSG         | CRP                     | CRP +              |
| Lee et al., 2009 (22)        | Naturalistic  | End stage renal disease      | 30   | 56.1 (10.7) | 21/9      | PSG              | CRP/IL-6                | CRP=0/IL-6+        |
| Marsland et al., 2008 (61)   | Naturalistic  | Community sample             | 76   | 45(6.5)     | 32/44     | Item             | IL-6                    | IL-6=0             |
| Martinez-Gomez, 2011 (62)    | Naturalistic  | Adolescents (13-17)          | 183  | 14.8 (1.3)  | 95/88     | Item             | CRP/IL-6                | CRP+/IL-6=0        |
| Matthews et al., 2010 (54)   | Epidemiologic | Community sample             | 340  | 52 (IQR 3)  | 0/340     | Qu/PSG           | CRP                     | CRP mixed          |
| McDade et al., 2006 (31)     | Naturalistic  | Community sample             | 188  | 59.5(4.3)   | 45/55     | Qu               | CRP                     | CRP=0              |
| Miller et al., 2009 (71)     | Epidemiologic | Civil service                | 4624 | 49.1(5.9)   | 3382/0    | Item             | CRP/IL-6                | CRP+/IL-6+         |
| Motivala et al., 2005 (67)   | Case Control  | Depression/controls          | 40   | 42.6(8.3)   | 40/0      | PSG              | IL-6*                   | IL-6=0             |
| Okun et al., 2007a (63)      | Naturalistic  | Pregnant                     | 35   | 31.0 (3.7)  | 0/35      | Qu               | CRP/IL-6/TNF*           | CRP=0/IL-6=0/TNF=0 |
| Okun et al., 2009 (42)       | Naturalistic  | Healthy controls             | 43   | 28.2(5.2)   | 0/43      | Qu               | CRP/IL-6/TNF*           | CRP=0/IL-6=0/TNF=0 |
| Patel et al., 2009 (73)      | Epidemiologic | OSA and non-OSA              | 614  | 46.1(14.4)  | 275/339   | Item/PSG         | CRP/IL-6/TNF*           | Mixed              |
| Ramey et al., 2012 (64)      | Epidemiologic | Police officers (shift work) | 85   | 39.6 (9.0)  | 85/0      | Item/Qu          | CRP                     | CRP-               |
| Rief et al., 2010 (68)       | Naturalistic  | Community sample             | 130  | 34.9(9.6)   | 74/56     | Qu/PSG           | CRP/IL-6*               | CRP=0/IL-6=0       |
| Sprod et al., 2010 (24)      | Experimental  | Breast/Prostate cancer       | 38   | 60(12.1)    | 11/27     | Qu               | IL-6/TNF                | IL-6 -             |
| Suarez, 2008 (45)            | Epidemiologic | Community sample             | 210  | 28.9 (9.7)  | 115/95    | Qu               | CRP/IL-6                | CRP=0/IL-6=0       |
| Stenholm et al., 2011(74)    | Epidemiologic | >=65                         | 751  | 72.9 (6.0)  | 335/416   | Item             | CRP/IL-6/TNF            | Mixed              |
| Taheri et al., 2007 (65)     | Epidemiologic | Community sample             | 907  | 52.5(8.1)   | 500/407   | Item/PSG         | CRP                     | CRP=0/TNF=0        |
| Taveras et al., 2011 (66)    | Epidemiologic | Post-partum females          | 479  | 37.8(5.1)   | 0/479     | Item             | CRP/IL-6                | CRP=0/IL-6=0       |
| Tuomilehto et al., 2009 (75) | Experimental  | Overweight with IGT          | 515  | 55(7)       | 230/285   | Item             | CRP/IL-6                | CRP+/IL-6=0        |
| Vgontzas et al., 1997 (69)   | Experimental  | 4 groups                     | 41   | 33.1(2.5)   | 31/10     | PSG              | IL-6/TNF*               | IL-6+/TNF+         |
| von Kanel et al., 2006 (25)  | Experimental  | Caregivers/non-caregivers    | 100  | 70.7 (7.9)  | 30/70     | PSG              | IL-6                    | IL-6=0             |

\*Studies that have evaluated sleep duration and inflammation as indexed by other cytokines including interleukin-1 $\beta$  (IL-1) ( $n = 2$ ) (8, 9), IL-1 receptor antagonist (IL-1ra) ( $n = 0$ ), soluble IL-6 receptor (sIL6R) ( $n = 1$ ) (10); IL-8 ( $n = 0$ ); tumor necrosis factor receptor I (TNFR1) ( $n = 1$ ) (11); and TNFR2 ( $n = 0$ ).

See references in main text for studies described in the table.

**Table S3.** Description of studies evaluating sleep duration as experimentally shortened, i.e., sleep deprivation or sleep restriction, and inflammation as indexed C-reactive protein (CRP) and circulating levels of interleukin-6 (IL-6). Sleep deprivation as partial night sleep deprivation (PSD) or total night sleep deprivation (TSD) was associated with CRP and IL-6 as a significant increase (+), significant decrease (-) or no difference (0).

| Study                         | Sleep deprivation | Sample               | N  | Age          | M/F   | Inflammation Assessment | Findings           |
|-------------------------------|-------------------|----------------------|----|--------------|-------|-------------------------|--------------------|
| Abdelmalek et al., 2012 (82)  | PSD               | Tunisian athletes    | 12 | 21.2 (1.2)   | 12/0  | IL-6                    | IL-6+              |
| Bollinger et al., 2010 (83)   | TSD               | German               | 6  | 21-32        | 6/0   | IL-6/TNF*               | IL-6=0/TNF=0       |
| Chennaoui et al., 2011 (78)   | TSD               | French               | 12 | 29.1(3.3)    | 12/0  | CRP/IL-6/TNF*           | CRP=0/IL-6=0/TNF=0 |
| Faraut et al., 2011 (79)      | PSD/napping       | Belgian              | 40 | 18-27        | 40/0  | CRP*                    | CRP=0              |
| Frey et al., 2007 (80)        | TSD               |                      | 19 | 28.1(8.6)    | 10/9  | CRP/IL-6*               | CRP=0/IL-6=0       |
| Haack et al., 2002 (84)       | TSD               | German               | 12 | 28.1(4.6)    | 12/0  | IL-6                    | IL-6=0             |
| Haack et al., 2007 (89)       | PSD 12 days       |                      | 18 | 27.3(5.8)    | 12/6  | CRP/IL-6                | CRP=0/IL-6=0       |
| Irwin et al., 2004 (85)       | PSD               | Alcoholics, controls | 50 | 40.6 (7.7)   | 50/0  | IL-6/TNF                | IL-6=0/TNF=0       |
| Meier-Ewert et al., 2004 (90) | TSD/PSD           |                      | 10 | 27.2         | 10/0  | CRP                     | CRP=0              |
| Redwine et al., 2000 (86)     | PSD               |                      | 31 | 35.8 (10.1)  | 31/0  | IL-6                    | IL-6=0             |
| Sauvet et al., 2010 (81)      | TSD               | French               | 12 | 29.1(3.3)    | 12/0  | CRP/IL-6/TNF*           | CRP=0/IL-6=0/TNF=0 |
| Schmid et al., 2011 (92)      | PSD               | German/Swiss         | 15 | 27.1(1.3)    | 15/0  | IL-6                    | IL-6=0             |
| Shearer et al., 2001 (93)     | TSD               |                      | 21 | 28.7 (21-47) | 21/0  | IL-6/TNF*               | IL-6=0/TNF=0       |
| van Leeuwen et al., 2009 (91) | PSD               | Finnish              | 19 | 23.1(2.5)    | 19/0  | CRP                     | CRP=0              |
| Vgontzas et al., 1999 (87)    | TSD               |                      | 8  | 23.6(1.0)    | 8/0   | IL-6                    | IL-6=0             |
| Vgontzas et al., 2004 (94)    | PSD               |                      | 25 | 25.2 (3.7)   | 12/13 | IL-6/TNF                | IL-6=0/TNF=0       |
| Vgontzas et al., 2007 (88)    | TSD               |                      | 41 | 23.3 (0.7)   | 20/21 | IL-6/TNF*               | IL-6=0             |

\*Studies that have evaluated sleep duration as experimentally shortened and inflammation as indexed by other cytokines including interleukin-1 $\beta$  (IL-1) ( $n = 2$ ) (12, 13), IL-1 receptor antagonist (IL-1ra) ( $n = 1$ ) (12), soluble IL-6 receptor (sIL6R), IL-8 ( $n = 1$ ) (14); tumor necrosis factor receptor I (TNFRI) ( $n = 1$ ) (15-17), and TNFRII ( $n = 1$ ) (16).

See references in main text for studies described in the table.

**Sleep disturbance and inflammation: TNF $\alpha$**

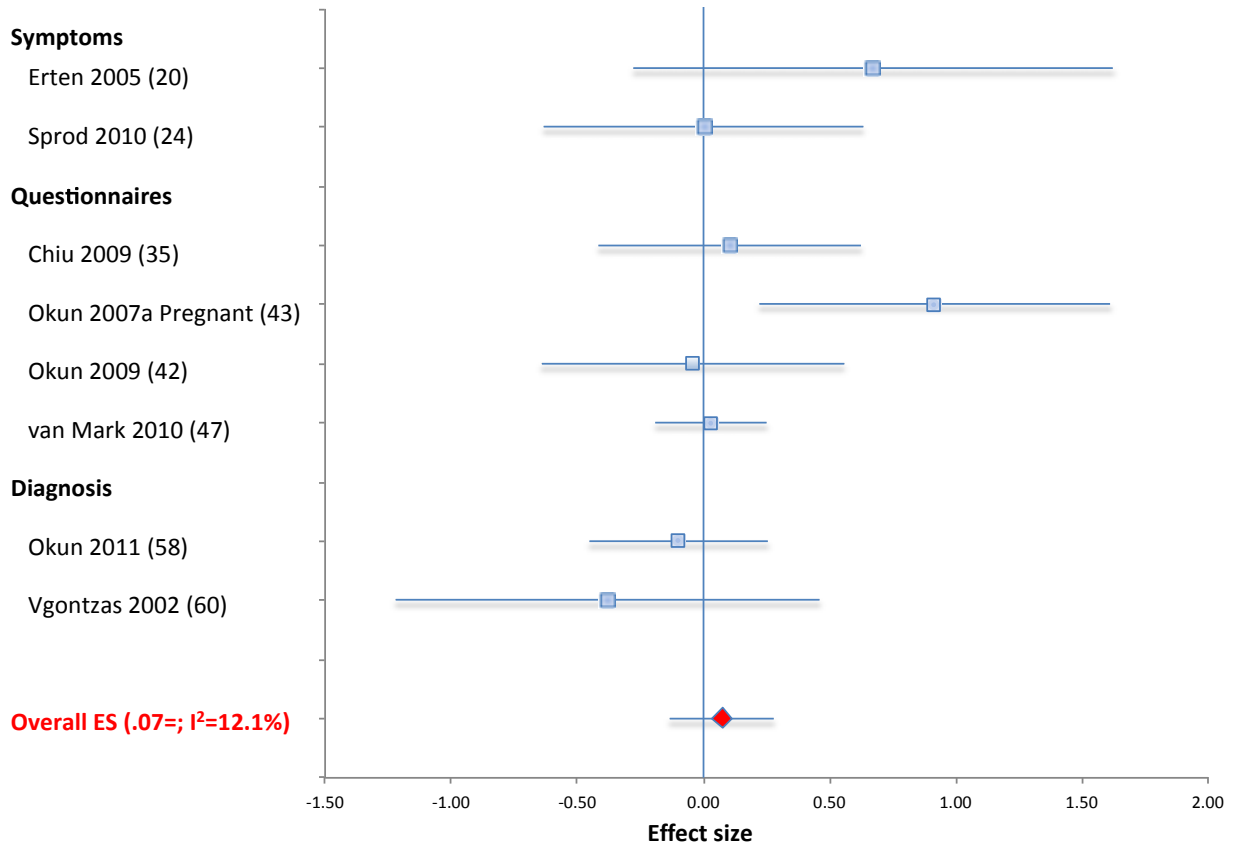

**Figure S2.** Forest plot of sleep disturbance associated with inflammation as indexed by circulating levels of tumor necrosis factor (TNF)- $\alpha$ . Sleep disturbance is assessed by self-reported symptoms and questionnaires. Results are expressed as effect sizes (ES) and 95% confidence intervals (95% CI). See references in main text for studies included in the figure.

**Sleep duration assessed continuously and inflammation: TNF $\alpha$**

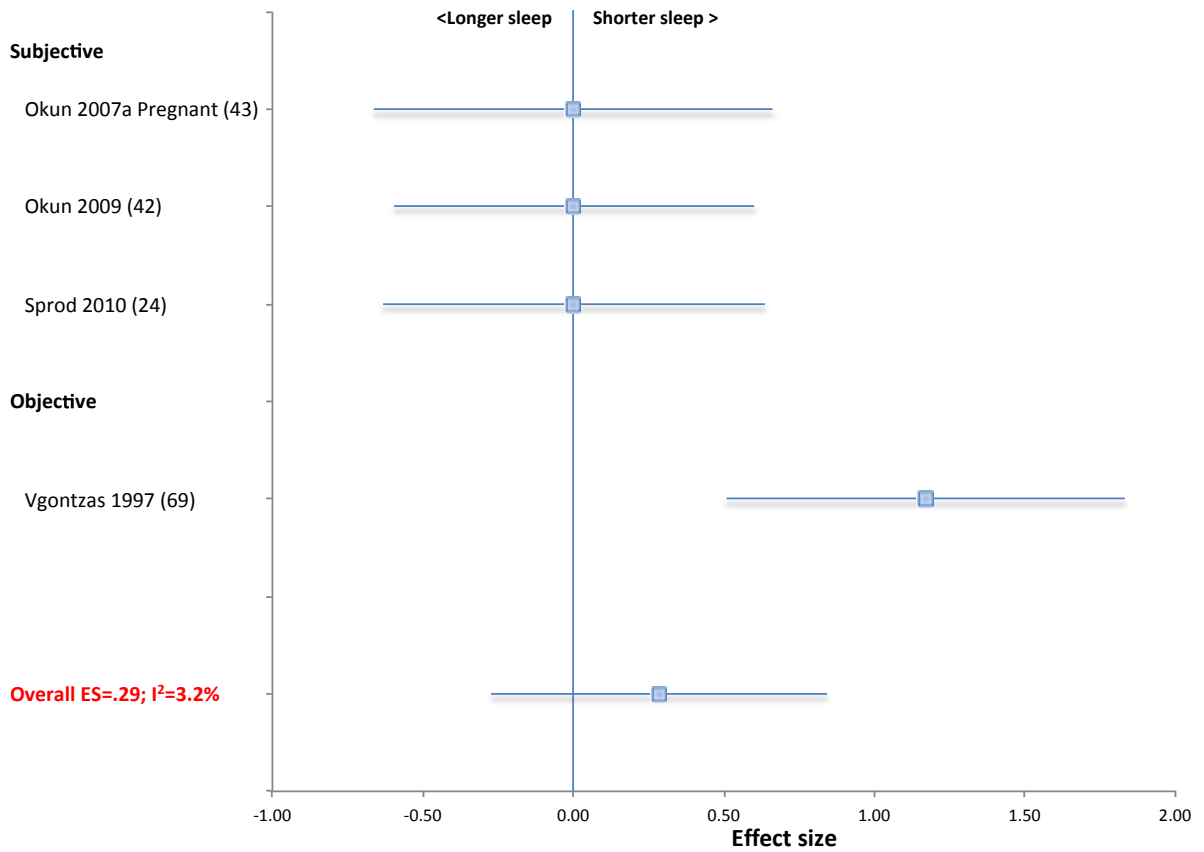

**Figure S3.** Forest plot of sleep duration associated with inflammation as indexed by circulating levels of tumor necrosis factor- $\alpha$ . Sleep duration is assessed continuously by subjective and objective measures. Results are expressed as effect sizes (ES) and 95% confidence intervals (95% CI). See references in main text for studies included in the figure.



**Sleep duration assessed categorically and inflammation: TNF $\alpha$**

**Short vs. normal**

Patel 2009 (Obj) (73)

Patel 2009 (Subj) (73)

Stenholm 2011 (74)

**Short vs. normal ES=.11; I<sup>2</sup>=0%**

**Long vs. normal**

Patel 2009 (Obj) (73)

Patel 2009 (Subj) (73)

Stenholm 2011 (74)

**Long vs. normal ES=.08; I<sup>2</sup>=8.0%**

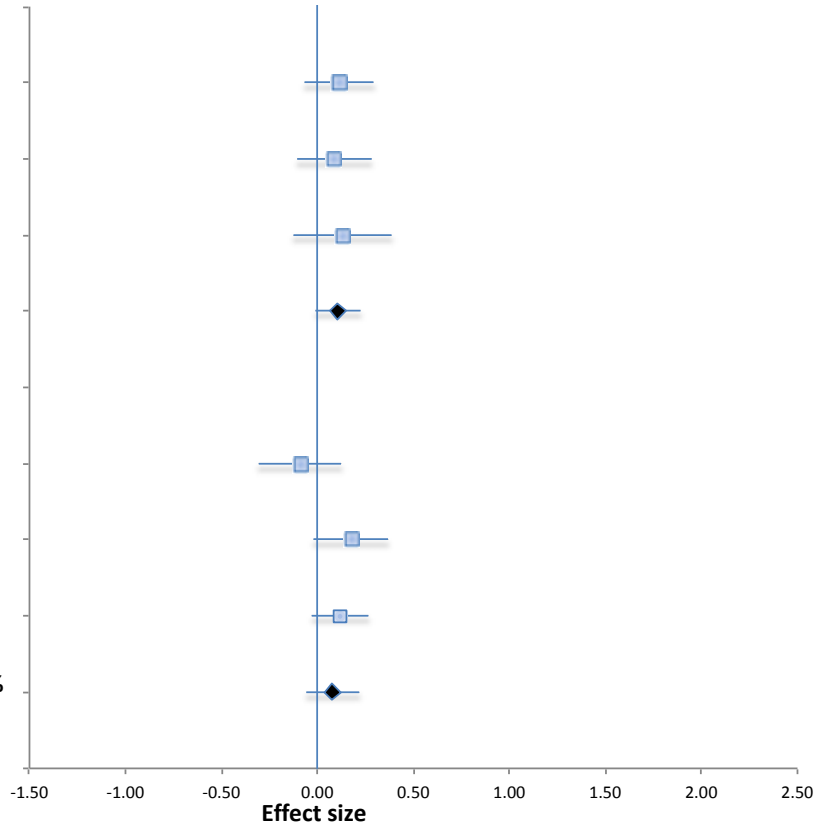

**Figure S4.** Forest plot of sleep duration associated with inflammation as indexed by circulating levels of tumor necrosis factor- $\alpha$ . Sleep duration is assessed categorically with normal sleep being defined by sleep duration 7-8 h per night, and short sleep as < 7 h per night, and long sleep as > 8 h per night. Results are expressed as effect sizes (ES) and 95% confidence intervals (95% CI). See references in main text for studies included in the figure.

**Experimental sleep deprivation and inflammation: TNF $\alpha$**

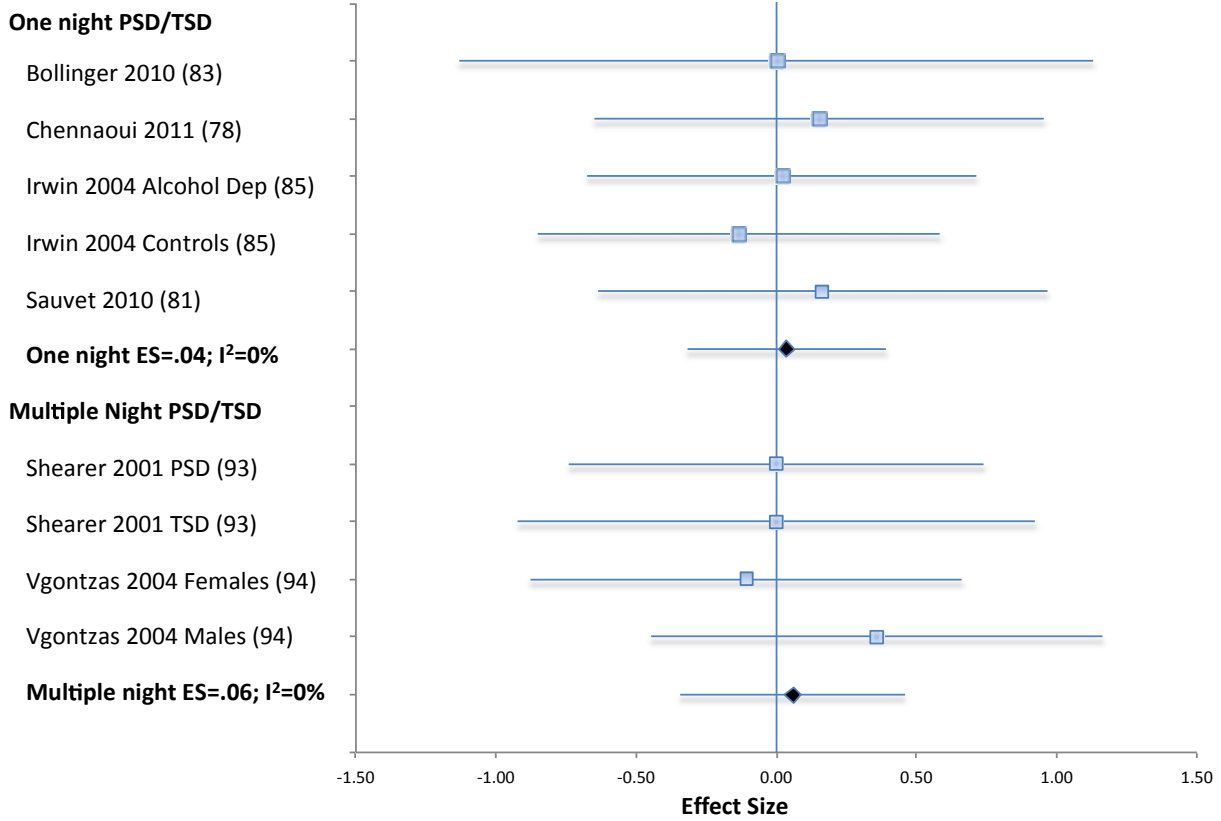

**Figure S5.** Forest plot of experimentally shortened sleep duration associated with inflammation as indexed by circulating levels of tumor necrosis factor- $\alpha$ . Sleep duration was shortened by either partial- or total night sleep deprivation for one night or for multiple nights. Results are expressed as effect sizes (ES) and 95% confidence intervals (95% CI). See references in main text for studies included in the figure.

## Supplemental References

1. Bower JE, Ganz PA, Irwin MR, Kwan L, Breen EC, Cole SW (2011): Inflammation and behavioral symptoms after breast cancer treatment: do fatigue, depression, and sleep disturbance share a common underlying mechanism? *J Clin Oncol* 29:3517-22.
2. Bower JE, Ganz PA, Tao ML, Hu W, Belin TR, Sepah S, Cole S, Aziz N (2009): Inflammatory biomarkers and fatigue during radiation therapy for breast and prostate cancer. *Clin Cancer Res* 15:5534-40.
3. Chiu YL, Chuang YF, Fang KC, Liu SK, Chen HY, Yang JY, Pai MF, Peng YS, Wu KD, Tsai TJ (2009): Higher systemic inflammation is associated with poorer sleep quality in stable haemodialysis patients. *Nephrol Dial Transplant* 24:247-51.
4. Erten Y, Kokturk O, Yuksel A, Elbeg S, Ciftci TU, Pasaoglu H, Ozkan S, Bali M, Arinsoi T, Sindel S (2005): Relationship between sleep complaints and proinflammatory cytokines in haemodialysis patients. *Nephrology (Carlton)* 10:330-5.
5. Song C, Lin A, Bonaccorso S, Heide C, Verkerk R, Kenis G, Bosmans E, Scharpe S, Whelan A, Cosyns P, de Jongh R, Maes M (1998): The inflammatory response system and the availability of plasma tryptophan in patients with primary sleep disorders and major depression. *J Affect Disord* 49:211-9.
6. Valentine RJ, Woods JA, McAuley E, Dantzer R, Evans EM (2011): The associations of adiposity, physical activity and inflammation with fatigue in older adults. *Brain Behav Immun* 25:1482-90.
7. Sprod LK, Palesh OG, Janelins MC, Peppone LJ, Heckler CE, Adams MJ, Morrow GR, Mustian KM (2010): Exercise, sleep quality, and mediators of sleep in breast and prostate cancer patients receiving radiation therapy. *Community Oncol* 7:463-471.
8. Patel SR, Zhu X, Storfer-Isser A, Mehra R, Jenny NS, Tracy R, Redline S (2009): Sleep duration and biomarkers of inflammation. *Sleep* 32:200-4.
9. Vgontzas AN, Papanicolaou DA, Bixler EO, Kales A, Tyson K, Chrousos GP (1997): Elevation of plasma cytokines in disorders of excessive daytime sleepiness: role of sleep disturbance and obesity. *J Clin Endocrinol Metab* 82:1313-6.

10. Motivala SJ, Sarfatti A, Olmos L, Irwin MR (2005): Inflammatory markers and sleep disturbance in major depression. *Psychosom Med* 67:187-94.
11. Rief W, Mills PJ, Ancoli-Israel S, Ziegler MG, Pung MA, Dimsdale JE (2010): Overnight changes of immune parameters and catecholamines are associated with mood and stress. *Psychosom Med* 72:755-62.
12. Frey DJ, Fleshner M, Wright KP, Jr. (2007): The effects of 40 hours of total sleep deprivation on inflammatory markers in healthy young adults. *Brain Behav Immun* 21:1050-7.
13. Sauvet F, Leftheriotis G, Gomez-Merino D, Langrume C, Drogou C, Van Beers P, Bourrilhon C, Florence G, Chennaoui M (2010): Effect of acute sleep deprivation on vascular function in healthy subjects. *J Appl Physiol* 108:68-75.
14. Faraut B, Boudjeltia KZ, Dyzma M, Rousseau A, David E, Stenuit P, Franck T, Van Antwerpen P, Vanhaeverbeek M, Kerkhofs M (2011): Benefits of napping and an extended duration of recovery sleep on alertness and immune cells after acute sleep restriction. *Brain Behav Immun* 25:16-24.
15. Chennaoui M, Sauvet F, Drogou C, Van Beers P, Langrume C, Guillard M, Gourby B, Bourrilhon C, Florence G, Gomez-Merino D (2011): Effect of one night of sleep loss on changes in tumor necrosis factor alpha (TNF- $\alpha$ ) levels in healthy men. *Cytokine* 56:318-324.
16. Shearer WT, Reuben JM, Mullington JM, Price NJ, Lee BN, Smith EO, Szuba MP, Van Dongen HP, Dinges DF (2001): Soluble TNF-alpha receptor 1 and IL-6 plasma levels in humans subjected to the sleep deprivation model of spaceflight. *J Allergy Clin Immunol* 107:165-70.
17. Vgontzas AN, Pejovic S, Zoumakis E, Lin HM, Bixler EO, Basta M, Fang J, Sarrigiannidis A, Chrousos GP (2007): Daytime napping after a night of sleep loss decreases sleepiness, improves performance, and causes beneficial changes in cortisol and interleukin-6 secretion. *Am J Physiol Endocrinol Metab* 292:E253-61.
